# Supplementary material for: Genetic dependency of Alzheimer’s disease-associated genes across cells and tissue types
Source: PubMed Central journal article supplement (PMC8187448; doi:10.1038/s41598-021-91713-2), 2021-06-08
Supplement: 41598_2021_91713_MOESM1_ESM.pdf [file 41598_2021_91713_MOESM1_ESM.pdf]

# Genetic Dependency of Alzheimer's Disease-Associated Genes across Cells and Tissue Types

Suraj K Jaladanki<sup>1#</sup>, Abdulkadir Elmas<sup>1#</sup>, Gabriel Santos Malave<sup>1</sup>, Kuan-lin Huang<sup>1\*</sup>

<sup>1</sup>Department of Genetics and Genomic Sciences, Center for Transformative Disease Modeling, Tisch Cancer Institute, Icahn Institute for Data Science and Genomic Technology, Icahn School of Medicine at Mount Sinai, New York, NY 10029, United States.

<sup>#</sup>These authors contributed equally.

\*Corresponding Author:  
Kuan-lin Huang, Ph.D.  
Department of Genetics and Genomic Sciences  
Icahn School of Medicine at Mount Sinai  
New York, NY 10029  
Email: [kuan-lin.huang@mssm.edu](mailto:kuan-lin.huang@mssm.edu)

## Supplementary Information

### Supplementary Table S1

Title: Full AD-Associated Gene List Utilized in Study

Description: The gene names for the 104 AD-associated genes utilized in the study are provided in alphabetical order.

### Supplementary Figure S1

Title: *GLS* in CNS cell lines against DEMETER2 scores

Description: *GLS* was identified in Figure 2b as a gene showing expression-driven dependency in CNS cell lines from RNAi knockdown screen data. The correlation plots of expression-driven dependency is shown for *GLS* in CNS cell lines against DEMETER2 scores.

**Supplementary Table S1: Full AD-Associated Gene List Utilized in Study**

|            |          |        |         |          |        |
|------------|----------|--------|---------|----------|--------|
| ABCA7      | BUB1     | FANK1  | MED6    | RFX4     | TYROBP |
|            | BZRAP1-  |        |         |          |        |
| ABCC11     | AS1      | FCER1G | MEF2C   | RNASE11  | UBE2C  |
| ABCC2      | C1ORF143 | FERMT2 | MID1IP1 | RPS18    | ZCWPW1 |
| ABI3       | CASS4    | GAB2   | MLL3S   | RPS27    | ZIC2   |
| AC074212.3 | CD2AP    | GJA1   | MS4A2   | SCIMP    |        |
| ACBD5      | CD33     | GLS    | MS4A6A  | SFRS3    |        |
| ACE        | CLNK     | GSTA4  | MT1JP   | SLC22A2  |        |
| ACTG1      | CLU      | HESX1  | MT1M    | SLC24A4  |        |
|            |          | HLA -  |         |          |        |
| ACTL9      | CNTNAP2  | DRB1   | MT1P3   | SNAP91   |        |
|            |          | HLA-   |         |          |        |
| ADAM10     | CR1      | DRB1   | NME8    | SNCA     |        |
| ADAMTS4    | CREBBP   | HS3ST1 | NYAP1   | SORL1    |        |
| AGTR1      | CST3     | HSPA1A | P2RX7   | SPI1     |        |
| ALPK2      | DGCR6    | HYDIN  | PCBP2   | STATIP1  |        |
| AMPD1      | DOCK2    | INPP5D | PCK2    | STIP1    |        |
| APH1B      | DOPEY1   | INPPD5 | PDGFB   | STON2    |        |
| APOE       | DTL      | KAT8   | PICALM  | SUZ12P1  |        |
| APP        | ECHDC3   | KIFAP3 | PPP2R5A | TEKT1    |        |
| AQP4       | EGR2     | LAMP2  | PSEN1   | TIMELESS |        |
| BIN1       | ENPP2    | LMAN1  | PSEN2   | TREM2    |        |
| BSN        | EPHA1    | MDGA1  | PTK2B   | TUBB4    |        |

The gene names for the 104 AD-associated genes utilized in the study are provided in alphabetical order.

**Supplementary Figure S1:** *GLS* in CNS cell lines against DEMETER2 scores

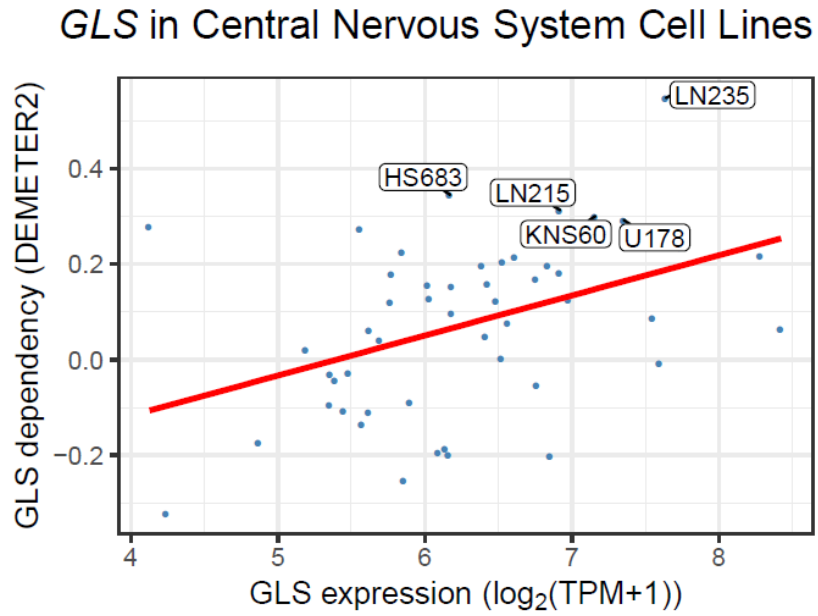

Description: *GLS* was identified in Fig. 2b as a gene showing expression-driven dependency in CNS cell lines from RNAi knockdown screen data. The correlation plot of expression-driven dependency is shown for *GLS* in CNS cell lines against DEMETER2 scores.
